# Supplementary material for: Electricity generation of a laminar-flow microbial fuel cell without any additional power supply
Source: Royal Society of Chemistry journal article supplement (doi:10.1039/c8ra07340f), 2018-01-01
Supplement: c8ra07340f1.pdf [file c8ra07340f1.pdf]

## Electronic Supplementary Information (ESI)

### **Electricity generation of a laminar-flow microbial fuel cell without any additional power supply**

Dingding Ye,<sup>\*ab</sup> Pengqing Zhang,<sup>ab</sup> Xun Zhu,<sup>\*ab</sup> Yang Yang,<sup>ab</sup> Jun Li,<sup>ab</sup> Qian Fu,<sup>ab</sup> Rong Chen,<sup>ab</sup> Qiang Liao,<sup>ab</sup> and Biao Zhang<sup>ab</sup>

<sup>a</sup> Key Laboratory of Low-grade Energy Utilization Technologies and Systems (Chongqing University), Ministry of Education, Chongqing 400030, China

<sup>b</sup> Institute of Engineering Thermophysics, Chongqing University, Chongqing 400030, China

\* Corresponding Authors, E-mail address: dingdingye@cqu.edu.cn (D. Ye), zhuxun@cqu.edu.cn (X. Zhu)

## Supplementary Figures and Tables

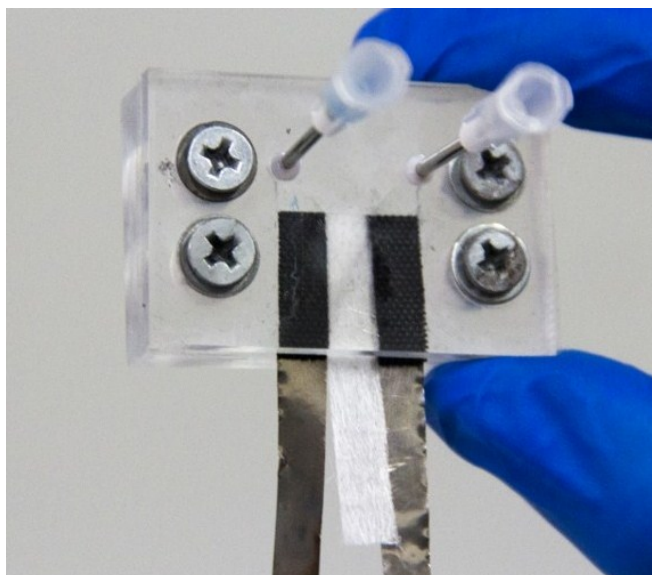

**Fig. S1** The fully assembled laminar-flow microbial fuel cell.

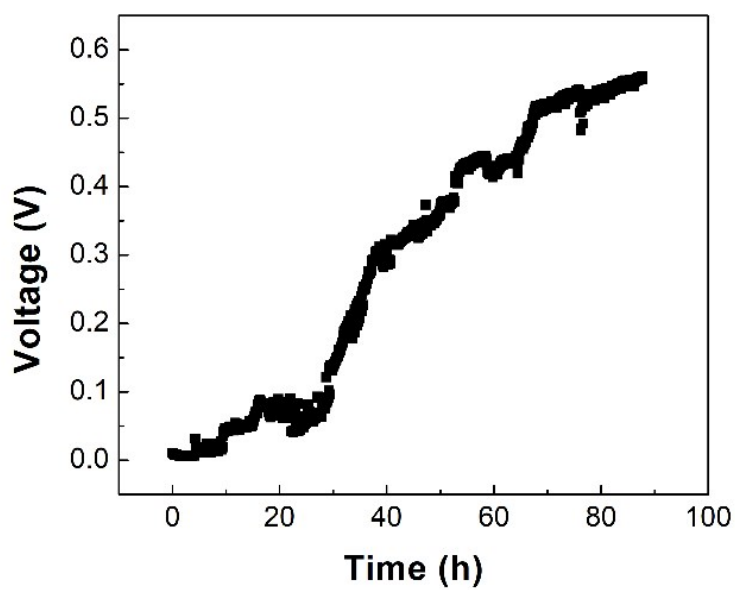

**Fig. S2** Voltage curve of the LFMFC during the start-up process.

**Table S1** Comparison of the cell performance with other  $\mu$ MFCs.

| <b>Maximum power density (W m<sup>-3</sup>)</b> | <b>Anode chamber volume (<math>\mu</math>L)</b> | <b>Internal resistance (<math>\Omega</math>)</b> | <b>Membrane</b> | <b>Cathode material</b> | <b>Anode material</b> | <b>Biocatalyst</b>                           | <b>Reference</b>  |
|-------------------------------------------------|-------------------------------------------------|--------------------------------------------------|-----------------|-------------------------|-----------------------|----------------------------------------------|-------------------|
| 2300                                            | 4.5                                             | 10000                                            | With            | Gold                    | Gold                  | Mixed bacteria                               | Choi et al., 2011 |
| 62.5                                            | 4                                               | 16000                                            | With            | Carbon cloth            | Carbon cloth          | <i>S. oneidensis</i> MR-1                    | Qian et al., 2011 |
| 11220                                           | 50                                              | 219 $\pm$ 10                                     | With            | 3D graphene scaffold    | Gold                  | Mixed bacteria                               | Ren et al., 2016  |
| 618 <sup>a</sup>                                | 40                                              | 2350                                             | Without         | Graphite                | Graphite              | Mixed bacteria                               | Ye et al., 2013   |
| 1810 <sup>a</sup>                               | 40                                              | 1092                                             | Without         | Graphite                | Graphite              | Mixed bacteria                               | Yang et al., 2016 |
| 497 <sup>b</sup>                                | 1.52                                            | N/A                                              | Without         | Carbon                  | Carbon                | Wild-type <i>Pseudomonas aeruginosa</i> PAO1 | Yang et al., 2017 |
| <b>3200 <math>\pm</math>100</b>                 | <b>27.75</b>                                    | <b>1577</b>                                      | <b>Without</b>  | <b>Carbon cloth</b>     | <b>Carbon cloth</b>   | <b>Mixed bacteria</b>                        | <b>This work</b>  |

a: calculated based on anode volume, b: calculated based on the anode volume of a single MFC

## References:

- S. Choi, H.-S. Lee, Y. Yang, P. Parameswaran, C. I. Torres, B. E. Rittmann, and J. Chae. *Lab Chip*, 2011, **11**, 1110–1117.
- F. Qian, Z. He, M. P. Thelen and Y. Li. *Bioresource Technol.*, 2011, **102**, 5836–5840.
- H. Ren, H. Tian, C. L. Gardner, T. L. Ren and J. Chae. *Nanoscale*, 2016, **8**, 3539–3547.
- D. Ye, Y. Yang, J. Li, X. Zhu, Q. Liao, B. Deng and R. Chen. *Int. J. Hydrogen Energy*, 2013, **38**, 15710–15715.
- Y. Yang, D. Ye, Q. Liao, P. Zhang, X. Zhu, J. Li and Q. Fu. *Biosens. Bioelectron.*, 2016, **79**, 406–410.
- W. Yang, K. K. Lee and S. Choi. *Sensor. Actuat. B: Chem.*, 2017, **243**, 292–297.
